# Supplementary material for: Twisted intramolecular charge transfer in a carbazole-based chromophore: the stable [(4-N-carbazolyl)-2,3,5,6-tetrachlorophenyl]bis(2,3,5,6-tetrachlorophenyl)methyl radical
Source: Royal Society of Chemistry journal article supplement (doi:10.1039/c7nj00733g), 2017-01-01
Supplement: c7nj00733g1.pdf [file c7nj00733g1.pdf]

## **Twisted intramolecular charge transfer in a carbazole-based chromophore. The stable [(4-*N*-carbazolyl)-2,3,5,6-tetrachlorophenyl]bis(2,3,5,6-tetrachlorophenyl)methyl radical**

Alejandra Gilabert,<sup>†</sup> Lluís Fajari,<sup>†</sup> Ignasi Sirés,<sup>‡</sup> Marta Reig,<sup>‡</sup> Enric Brillas,<sup>‡</sup>  
Dolores Velasco,<sup>‡</sup> Josep M Anglada,<sup>†</sup> Luis Juliá<sup>†\*</sup>

<sup>†</sup>*Departament de Química Biològica i Modelització Molecular, Institut de Química Avançada de Catalunya (CSIC), Jordi Girona 18-26, 08034 Barcelona, Spain.*

<sup>‡</sup>*Laboratori d'Electroquímica dels Materials i del Medi Ambient. Departament de Química Física, Universitat de Barcelona, Martí Franquès 1-11, 08028 Barcelona, Spain.*

<sup>‡</sup>*Departament de Química Inorgànica i Orgànica, secció Química Orgànica, Institut de Nanociència i Nanotecnologia (IN<sup>2</sup>UB), Universitat de Barcelona, Martí Franquès 1-11, 08028 Barcelona, Spain.*

### **SUPPLEMENTARY MATERIAL**

| <b><u>Table of contents</u></b> | <b><u>page</u></b> |
|---------------------------------|--------------------|
| Figure S1-S9                    | S2-S7              |
| Table S1                        | S8                 |
| Table S2                        | S9                 |

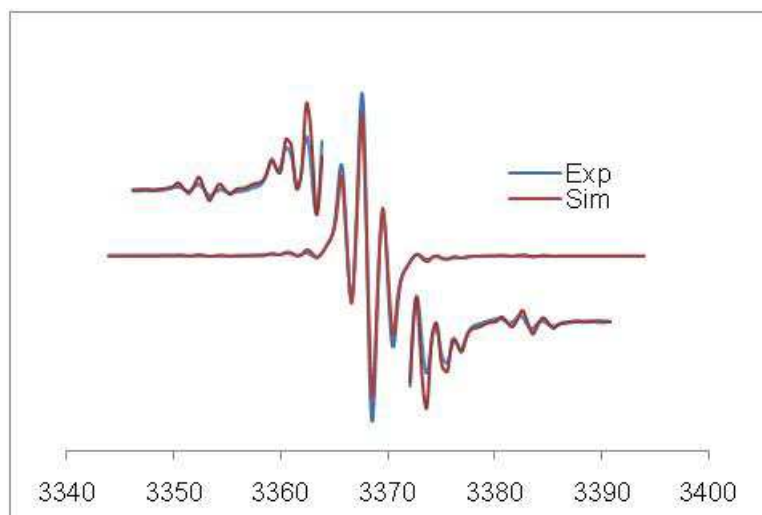

**Figure S1.** EPR spectrum of  $\text{CH}_2\text{Cl}_2$  solution ( $\sim 10^{-3}$  M) of **1** at 298 K. The extensions show a more detailed  $^{13}\text{C}$  couplings.

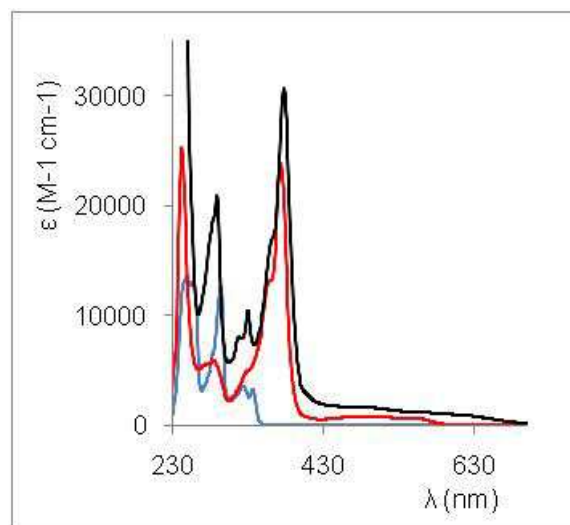

**Figure S2.** UV-vis spectra of **1** (black), DTM (red) and carbazole (blue) in THF.

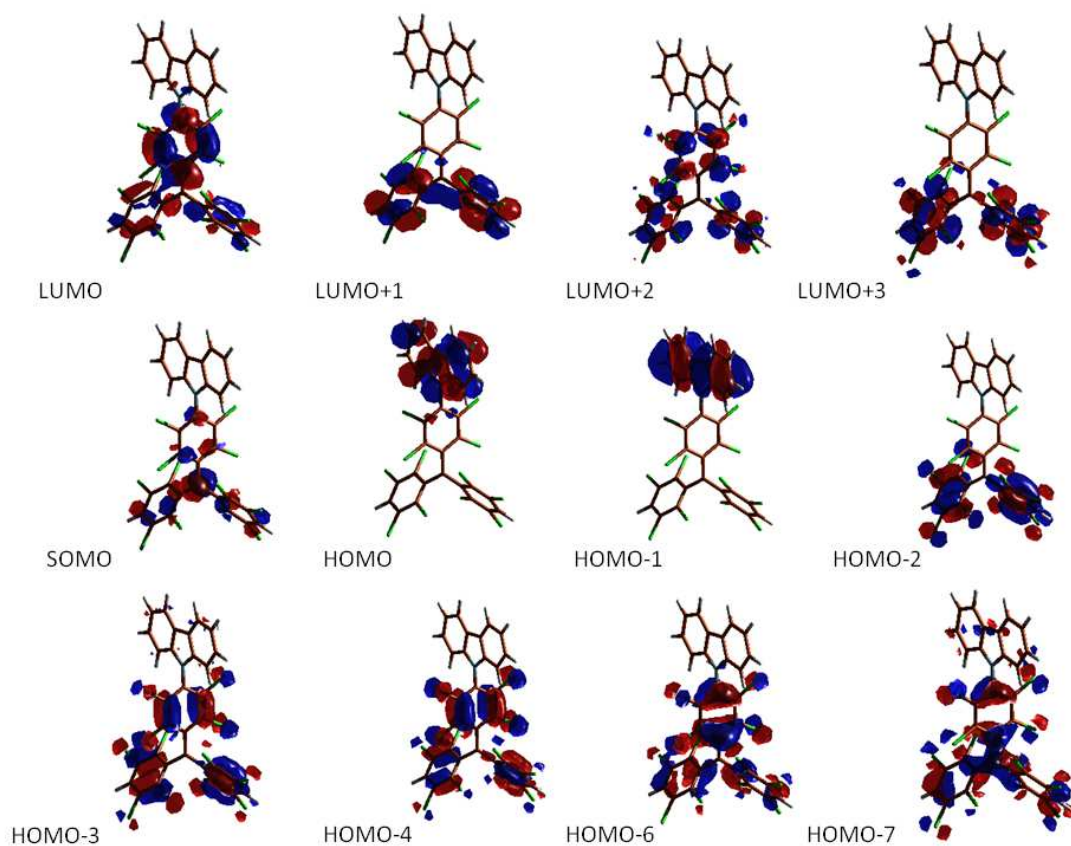

**Figure S3.** Electronic features of the most relevant molecular orbitals involved in the electronic spectra. A contour value of 0.08 a.u. have been employed for this draw.

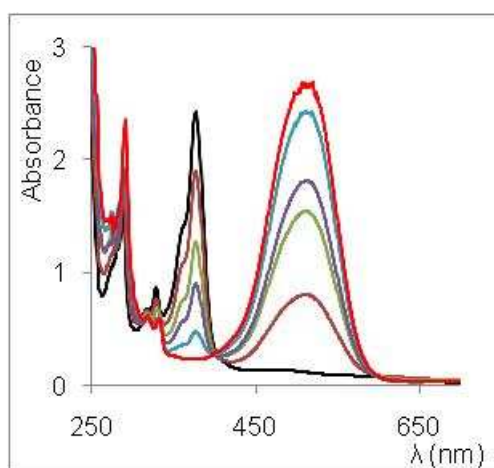

**Figure S4.** UV-VIS spectra of **1** in THF with different amounts of aqueous solution of TBAH.

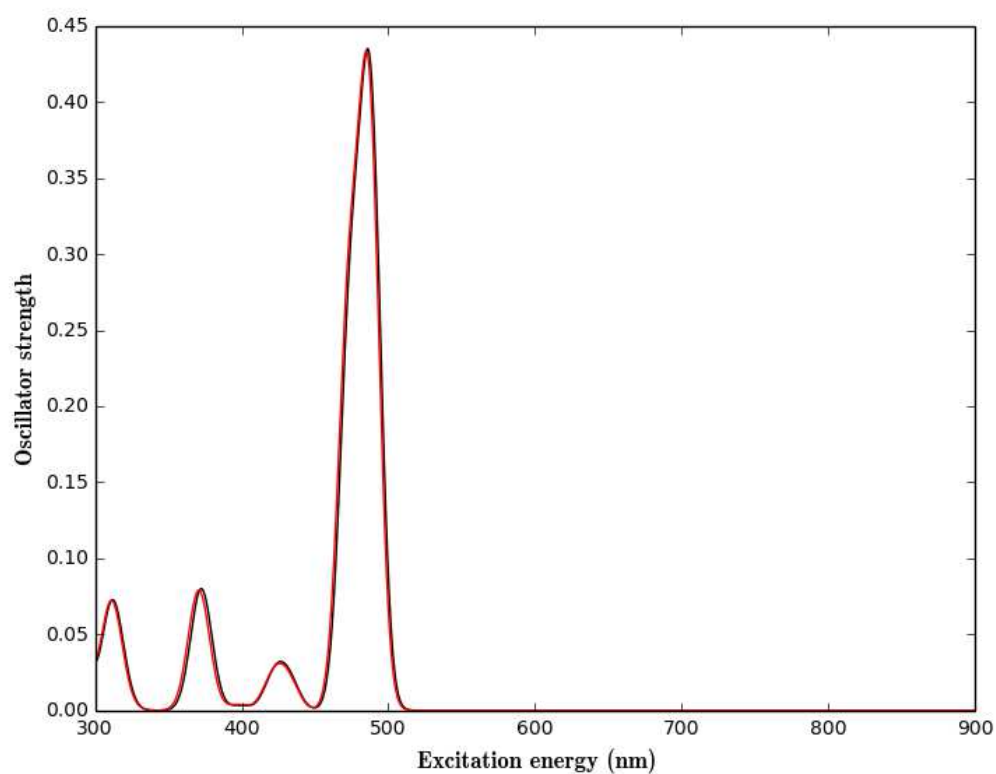

**Figure S5.** Calculated electronic spectra of anion  $1^-$  in  $\text{CH}_2\text{Cl}_2$  (black) and DMF (red). Both lines are overlapped.

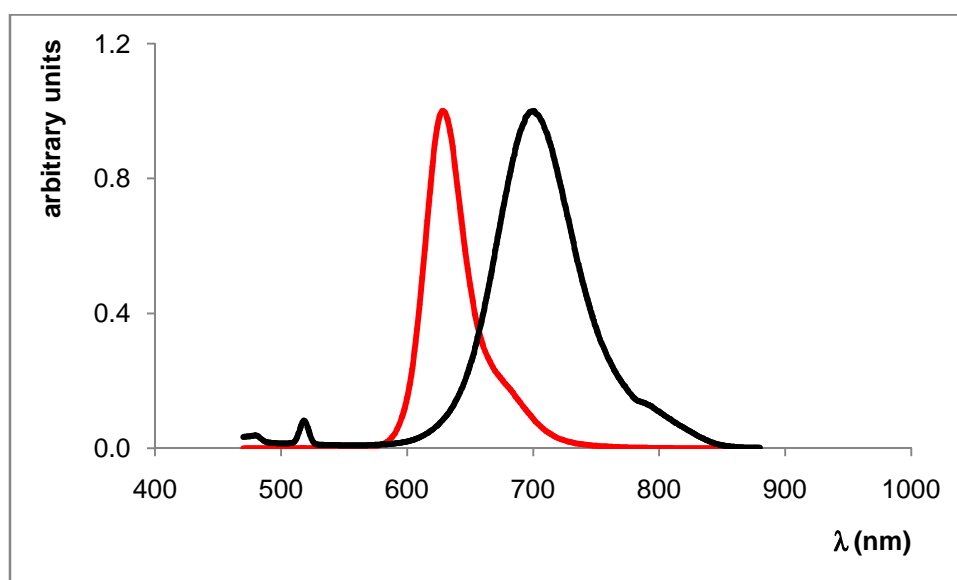

**Figure S6.** Normalized emission spectra of cyclohexane solutions ( $10^{-4}$  M) of radical adducts, **1** (black) and czTTM (red).

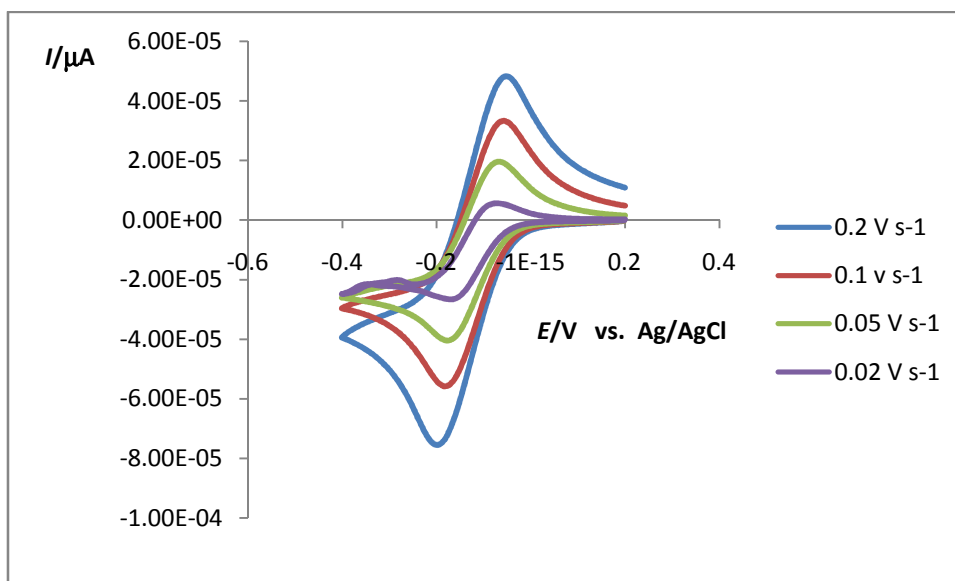

**Figure S7.** Cyclic voltammograms for the reduction of **1** ( $\sim 10^{-3} \text{ M}$ ) in  $\text{CH}_2\text{Cl}_2$  with  $0.1 \text{ M}$  TBAP on Pt at  $25 \text{ }^\circ\text{C}$  at different scan rates, vs. Ag/AgCl. The initial and final potential was  $0.2 \text{ V}$ ; the reverse potential was  $-0.4 \text{ V}$ .

alfaH\_PROTON\_V400\_29May17\_01

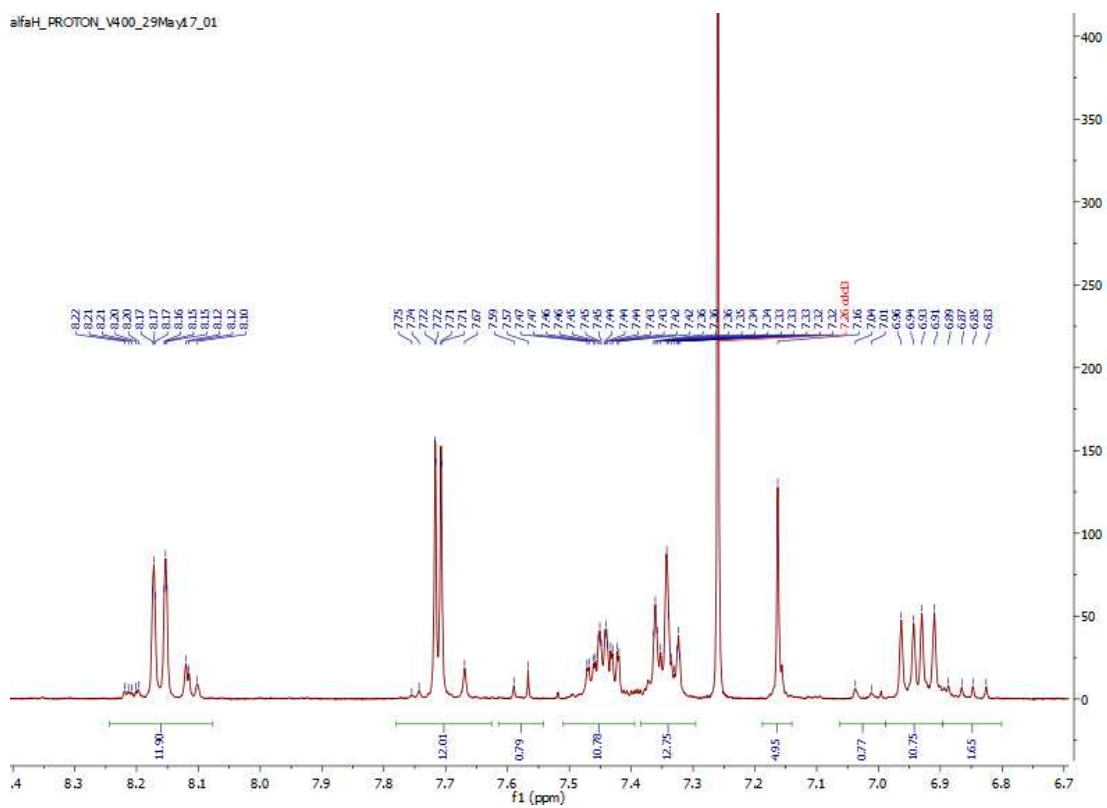

**Figure S8.** <sup>1</sup>H NMR spectrum (400 MHz; CDCl<sub>3</sub>) of [4-(N-carbazoyl)-2,3,5,6-tetrachlorophenyl]bis(2,3,5,6-tetrachlorophenyl)methane (**1H**)

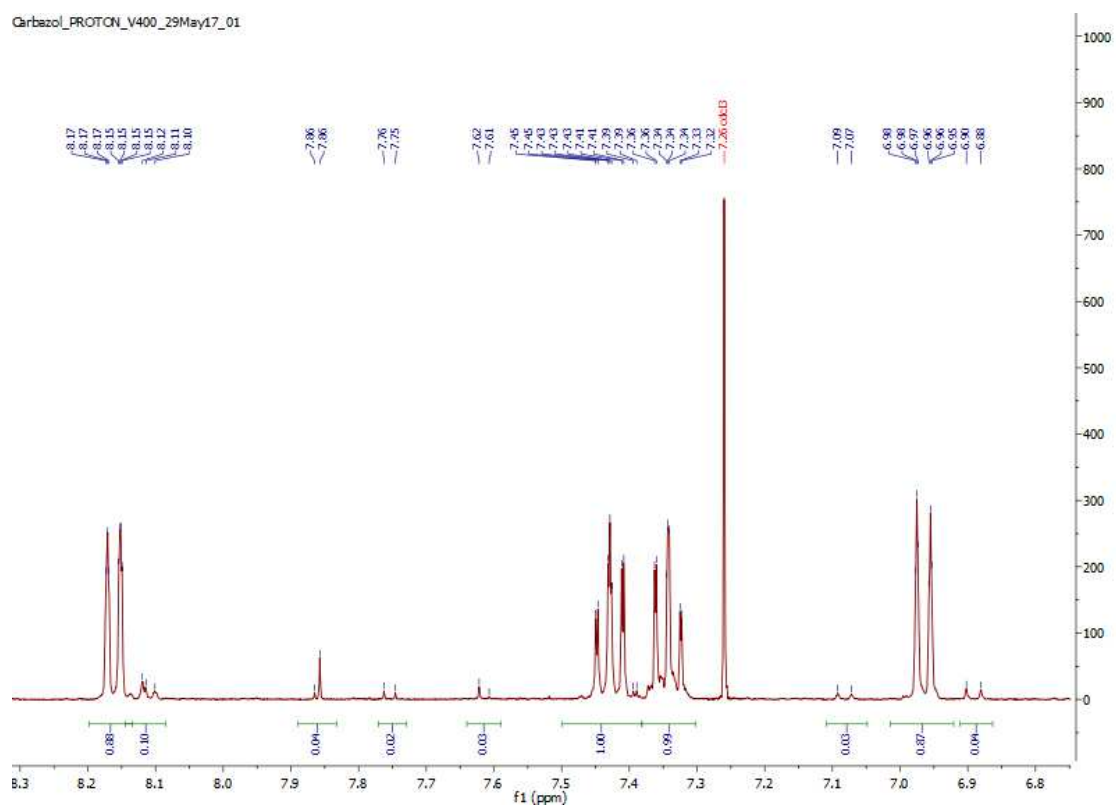

**Figure S9.**  $^1\text{H}$  NMR spectrum (400 MHz;  $\text{CDCl}_3$ ) of N-pentachlorophenylcarbazole

**Table S1.** Intramolecular charge transfer band in the visible spectrum of **1** in different solvents (dipole moment measured in debyes).

| Solvent         | Dipole moment (D) | $\lambda(\epsilon)$ nm(M <sup>-1</sup> cm <sup>2</sup> Å <sup>-1</sup> ) |
|-----------------|-------------------|--------------------------------------------------------------------------|
| Cyclohexane     | 0.0               | 640(1350)                                                                |
| Toluene         | 0.31              | 633(1000)                                                                |
| Chloroform      | 1.08              | 612(980)                                                                 |
| Dichloromethane | 1.60              | 600(950)                                                                 |
| Tetrahydrofuran | 1.63              | 609(980)                                                                 |
| Ethyl acetate   | 1.78              | 607(710)                                                                 |
| Acetone         | 2.88              | 598(950)                                                                 |



**Table S2.** Optimized Cartesian coordinates (in Å) of radical adduct **1** obtained at B3LYP/6-31+G(2df,2p) level of theory. The B3LYP absolute energy is - 6764.50812 hartree

|    |           |           |           |
|----|-----------|-----------|-----------|
| C  | -6.987839 | -2.808435 | 1.161790  |
| C  | -5.638229 | -3.165802 | 1.307937  |
| C  | -4.614902 | -2.293044 | 0.945538  |
| C  | -4.980375 | -1.051529 | 0.430419  |
| C  | -6.334892 | -0.670055 | 0.275130  |
| C  | -7.342012 | -1.564595 | 0.648197  |
| N  | -4.166176 | -0.000097 | 0.000031  |
| C  | -4.980296 | 1.051378  | -0.430402 |
| C  | -6.334842 | 0.669965  | -0.275217 |
| C  | -7.341892 | 1.564553  | -0.648358 |
| C  | -6.987624 | 2.808379  | -1.161918 |
| C  | -5.637987 | 3.165686  | -1.307958 |
| C  | -4.614727 | 2.292880  | -0.945485 |
| C  | -2.041239 | 0.618747  | 1.035316  |
| C  | -0.642292 | 0.618605  | 1.034987  |
| C  | 0.099428  | -0.000034 | 0.000056  |
| C  | -0.642252 | -0.618730 | -1.034852 |
| C  | -2.041203 | -0.618967 | -1.035182 |
| C  | -2.758451 | -0.000123 | 0.000061  |
| C  | 1.578664  | 0.000051  | -0.000001 |
| C  | 4.062178  | 2.568463  | 1.323996  |
| C  | 3.720861  | 3.697521  | 0.591295  |
| C  | 2.689233  | 3.629320  | -0.335529 |
| C  | 1.997445  | 2.432096  | -0.541577 |
| C  | 2.315224  | 1.265624  | 0.200047  |
| C  | 3.369119  | 1.367674  | 1.143920  |
| C  | 2.315245  | -1.265547 | -0.200065 |
| C  | 3.368874  | -1.367734 | -1.144190 |
| C  | 4.061886  | -2.568573 | -1.324234 |
| C  | 3.720746  | -3.697512 | -0.591279 |
| C  | 2.689361  | -3.629155 | 0.335803  |
| C  | 1.997680  | -2.431873 | 0.541865  |
| Cl | 3.768009  | 0.032438  | 2.177101  |
| Cl | 0.807279  | 2.384255  | -1.803471 |
| Cl | 3.767655  | -0.032741 | -2.177752 |
| Cl | 0.807866  | -2.383750 | 1.804070  |
| Cl | 0.170908  | -1.305896 | -2.404869 |
| Cl | 0.170794  | 1.306143  | 2.404864  |
| Cl | 2.314965  | -5.065211 | 1.237550  |
| Cl | 5.350420  | -2.713390 | -2.479306 |
| Cl | 2.314680  | 5.065514  | -1.236993 |
| Cl | 5.351012  | 2.713055  | 2.478755  |
| Cl | -2.927332 | 1.345702  | 2.330787  |
| Cl | -2.927235 | -1.345785 | -2.330772 |
| H  | -7.760154 | -3.510396 | 1.453811  |
| H  | -5.384467 | -4.139776 | 1.710553  |
| H  | -3.575380 | -2.575044 | 1.060975  |
| H  | -8.386092 | -1.293023 | 0.539873  |
| H  | -8.385994 | 1.293028  | -0.540114 |
| H  | -7.759885 | 3.510377  | -1.453994 |
| H  | -5.384150 | 4.139651  | -1.710551 |
| H  | -3.575184 | 2.574832  | -1.060845 |
| H  | 4.256005  | 4.624509  | 0.741180  |
| H  | 4.255824  | -4.624535 | -0.741179 |
